# Supplementary material for: Creation of an Enhanced Recovery After Surgery (ERAS) Guideline for neonatal intestinal surgery patients: a knowledge synthesis and consensus generation approach and protocol study
Source: PubMed Central journal article supplement — BMJ Open. 2018 Dec 9;8(12):e023651. doi: 10.1136/bmjopen-2018-023651 (PMC6303622; doi:10.1136/bmjopen-2018-023651), 2018-12-09
Supplement: bmjopen-2018-023651supp002.pdf [file bmjopen-2018-023651supp002.pdf]

**Table S1: Neonatal Operative Skin Preparation Solution Evidence Summary with Level of Evidence (2011 Oxford Level of Evidence)**

| Study                                               | Type of Study                                                         | Population                                                         | Intervention                                                                                                                                          | Outcomes                                                                                                         | Key findings                                                                                                                                                                                              | Level of Evidence/Quality                                   |
|-----------------------------------------------------|-----------------------------------------------------------------------|--------------------------------------------------------------------|-------------------------------------------------------------------------------------------------------------------------------------------------------|------------------------------------------------------------------------------------------------------------------|-----------------------------------------------------------------------------------------------------------------------------------------------------------------------------------------------------------|-------------------------------------------------------------|
| Kieran et al. Arch Dis Child Fetal Neonatal Ed 2018 | RCT (2 center) Ireland                                                | NICU infants (n=304) <31 weeks having CVCs inserted                | Skin disinfection with either 2% CHG w 70% isopropyl alcohol vs 10% povidine iodine                                                                   | CLABSI<br>Skin reactions<br>Thyroid dysfunction                                                                  | No difference in CLABSI (# or rate per 1000 catheter days).<br>Skin reaction rates <1%, and not different between groups<br>More infants in PI group req'd thyroxine                                      | LOE 2<br>Quality Moderate (underpowered)                    |
| Sinha et al. Cochrane Library, 2015                 | Cochrane Review<br>12 studies: 7 hospital, 5 community based          | Term, Late preterm/ Hospitals<br>Term, Late preterm/Community care | Chlorhexidine vs dry cord care or total body cleansing vs usual care (0.25%-4% CHG)                                                                   | Neonatal mortality<br>Omphalitis occurrence                                                                      | Hospitals: skin or cord cleaning=no difference in mortality, reduced omphalitis<br>Community care: CHG cord cleansing vs no care may reduce omphalitis, no effect on mortality                            | LOE 1<br>Quality Variable (low, moderate, high)             |
| Abdeyazdan et al. Educ Health Promot 2014           | Single blinded clinical trial with "within subjects" design           | NICU infants >28 weeks and 1000g (n=98).                           | Half of body (random determination) disinfected with 10% povidine/iodine, other half with 2% CHG                                                      | Differences in skin culture rates before, immediately after, 2h later                                            | Significant difference in skin culture positivity Immediately following skin decontamination (3.1% vs 17.3%: favoring povidine/iodine)                                                                    | LOE 2<br>Quality Moderate                                   |
| Linder et al. Acta Paediatr (2004)                  | Retrospective Comparative cohort study (Israel)                       | Single institution NICU Skin disinfection study                    | 1992-93-10% povidine-iodine<br>1996-96-0.5% CHG/70% isopropanol                                                                                       | Positive blood cultures and sepsis symptoms ("true infection") and "contamination"                               | CHG group lower GA and BW<br>No difference in rates of "true infection" or "contamination"                                                                                                                | LOE 3<br>Quality Moderate                                   |
| Chapman et al. J Perinatol (2012)                   | Review article (summarizing 11 cohort studies)                        | >1200 NICU infants <32 weeks GA                                    | Variety of CHG (0.5-4%, some with alcohol) exposures. Indications: whole body bathing, cord care, PICC placement, "invasive procedures" (not surgery) | Skin changes (contact dermatitis, severe skin irritation).<br>Detectable levels of CHG in blood                  | Of papers reporting adverse outcome, these included contact dermatitis, severe skin irritation (n=23). Of 3 studies reporting detection of CHG (total 58 pts, 22 had detectable levels of CHG)            | Review (not included but identified for citation searching) |
| Garland et al. Pediatr Infect Dis J (1995)          | Non-randomized, multicenter, sequential comparative cohort study (US) | 254 NICU term infants (GA 35.7 w)                                  | PIV catheter site cleansing with either 10% povidine iodine or 0.5% CHG/70% isopropyl alcohol                                                         | Catheter colonization; and Catheter-related bacteremia (+ blood culture and catheter colonization with same org) | Catheter colonization rate lower in CHG patients (4.7 vs 9.3%). In povidine/iodine site cleanses, rate is correlated with duration of IV access.<br>No difference in rates of catheter related bacteremia | LOE 3<br>Quality Moderate                                   |
| Darmstadt et al. Pediatr Infect Dis 2007            | RCT, single center (India)                                            | 344 NICU patients >1000g                                           | Randomized to placebo or 0.44% CHG body wipe                                                                                                          | Skin cultures taken at various time points after wipe<br>Skin related adverse effects                            | Skin culture positive rates 35-55% lower in CHG group. No difference in skin condition between groups                                                                                                     | LOE 2<br>Quality Moderate                                   |
| Nuntnarumit, et al. Inf Contr Hosp Epidemiol 2013   | RCT single center (Thailand)                                          | 212 late preterm infants >1500 g                                   | Randomized to 1%CHG vs10% Povidine iodine<br>After skin allowed to dry, prep wiped off with normal saline                                             | Blood culture positive rates<br>Skin related adverse effects                                                     | No positive cultures in CHG group. 2.9% positive cultures in PI group.<br>No skin erythema, burn or contact dermatitis or evidence of systemic effect?                                                    | LOE 2<br>Quality Moderate                                   |

CLABSI =Central Line Associated Blood Stream Infection; RCT=Randomized Controlled Trial; GA= Gestational Age ; BW= Birth Weight; CHG=Chlorhexidine Gluconate; NICU=Neonatal Intensive Care Unit
